# Supplementary material for: Highly effective phosphate electrochemical sensor based on tetrathiafulvalene
Source: Royal Society of Chemistry journal article supplement (doi:10.1039/b509133k), 2005-01-01
Supplement: b509133k.pdf [file b509133k.pdf]

## Supporting Information

### Highly Effective Phosphate Electrochemical Sensor Based On Tetrathiafulvalene

Haiyan Lu<sup>ab</sup>, Wei Xu<sup>\*a</sup>, Deqing Zhang, Daoben Zhu<sup>\*a</sup>

1. Synthetic Experimental
2. CV Study
3. <sup>1</sup>H NMR spectra study:
4. X-ray crystallography

## 1. Synthetic Experimental

A solution of the acid chloride (100mg, 0.28mmol) in dry THF (10ml) was added dropwise to 2-aminopyridine (120mg, 1.25mmol) in dry THF (20ml), under magnetic stirring. The solution became clear and red precipitate was formed. After 4h of stirring at room temperature, the solvent was evaporated, and the red solid was dissolved in  $\text{CH}_2\text{Cl}_2$  and washed with water, dried over  $\text{MgSO}_4$ , and filtered. Finally, the extracts were concentrated in vacuo, and the residue was subjected to column chromatography (silica gel,  $\text{CHCl}_3$ ) affording **1** (68mg, 59%).  $^1\text{H}$  NMR ( $\text{DMSO-d}_6$ )  $\delta$  11.00 (s, NH, 1H), 8.38 (d,  $J=3.27\text{Hz}$ , 1H), 8.13 (s, C=C-H, 1H), 7.97 (d,  $J=10.05\text{Hz}$ , 1H), 7.82 (t,  $J=7.59$ , 7.68Hz, 1H), 7.17(t,  $J=5.73$ , 5.46Hz, 1H), 2.50 (s, 6H) ppm;  $^{13}\text{C}$  NMR:  $\delta$  158.2, 151.8, 148.5, 138.8, 133.7, 128.5, 127.3, 126.7, 120.6, 114.95, 113.2, 107.1, 18.99ppm. MS  $m/z$ : 416 $[\text{M}^+]$ .

## 2. CV Study

### A. Titration experiments:

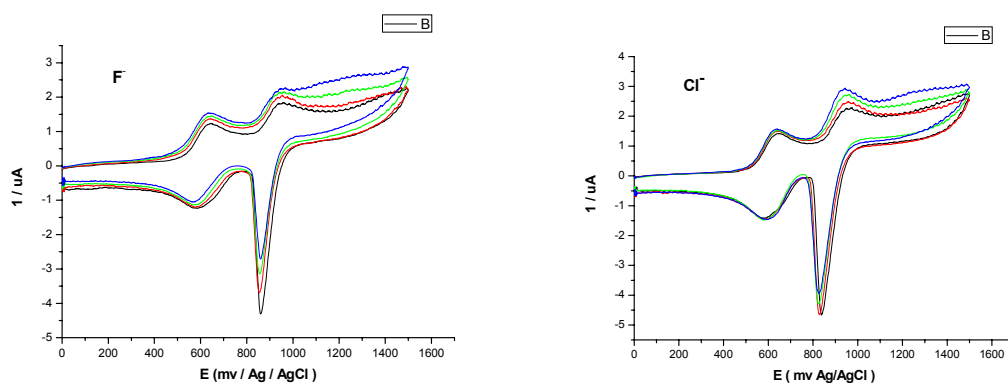

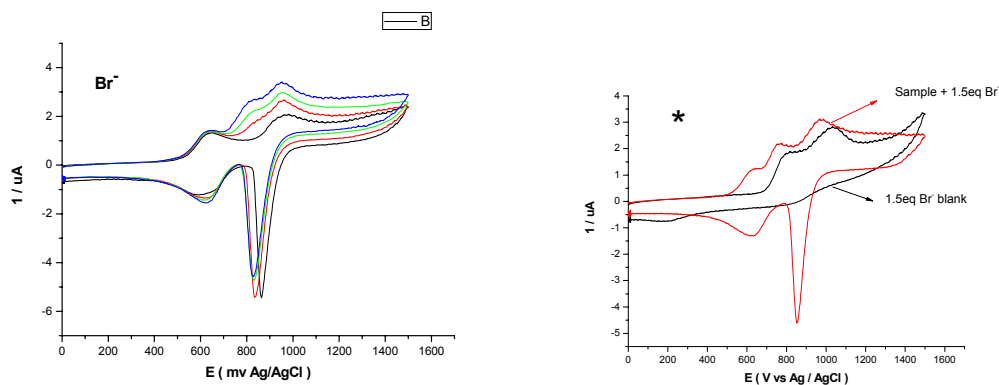

(\* In the absence of the receptor, the  $\text{Br}^-$  ion undergoes oxidation in solution at a potential which is shown in CV <sup>a</sup>)

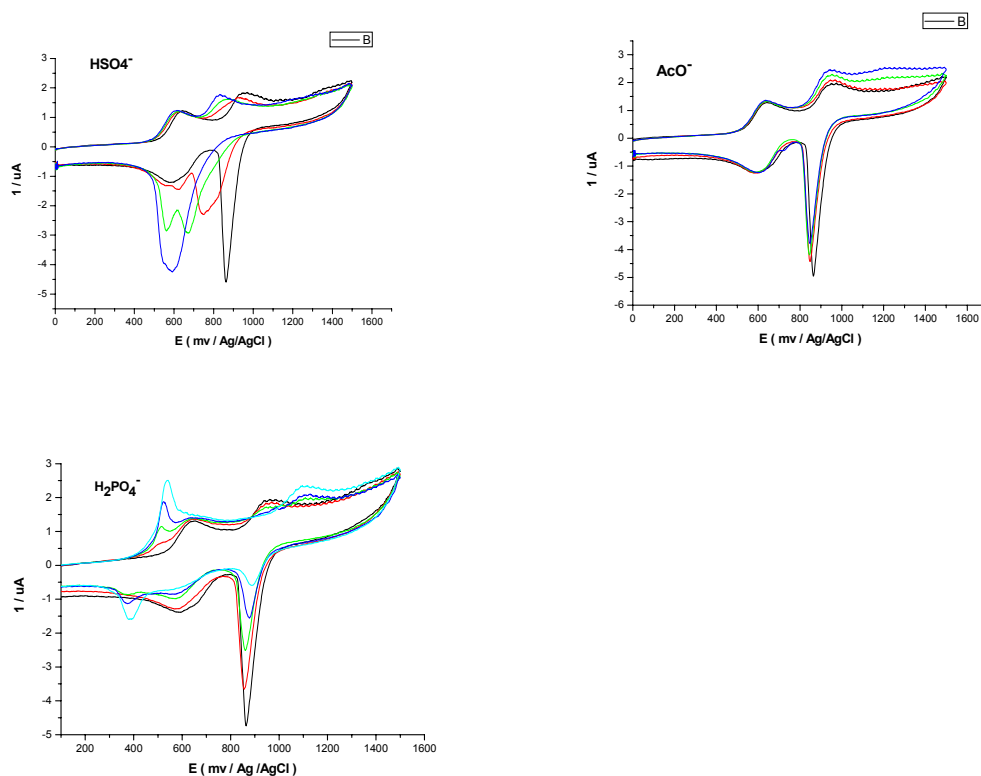

Figure 1. Cyclic Voltammograms of receptor **1** recorded in  $\text{CH}_2\text{Cl}_2$  ( $1.67 \times 10^{-4} \text{M}$ ) and  $\text{Bu}_4\text{NClO}_4$  (0.1M) as the supporting electrolyte in the increasing amounts of anions (0.5eq; 1eq; 1.5eq).

Reference:

a K. A. Nielsen, J. O. Jeppesen, E. Levillain, J. Becher, *Angew. Chem. Int. Ed.* **2003**, 42, 187.

B. Competition experiments:

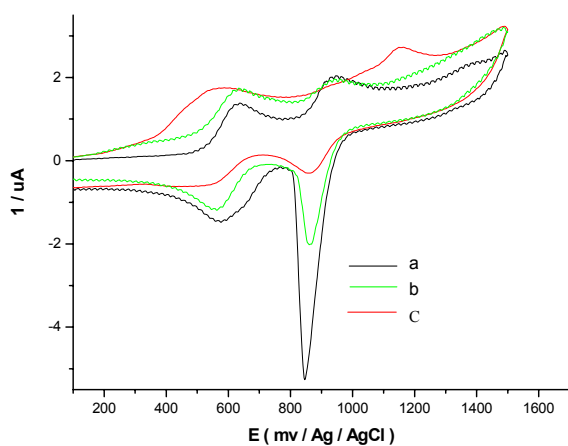

**a.** receptor **1**; **b.** receptor **1** upon addition of 1.5 equiv  $F^-$ ; **c.** receptor **1** upon addition of 1.5 equiv  $H_2PO_4^-$  in the presence of 1.5 equiv  $F^-$ .

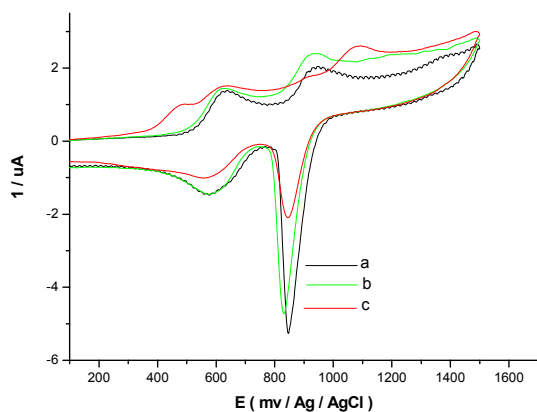

**a.** receptor **1**; **b.** receptor **1** upon addition of 1.5 equiv  $Cl^-$ ; **c.** receptor **1** upon addition of 1.5 equiv  $H_2PO_4^-$  in the presence of 1.5 equiv  $Cl^-$ .

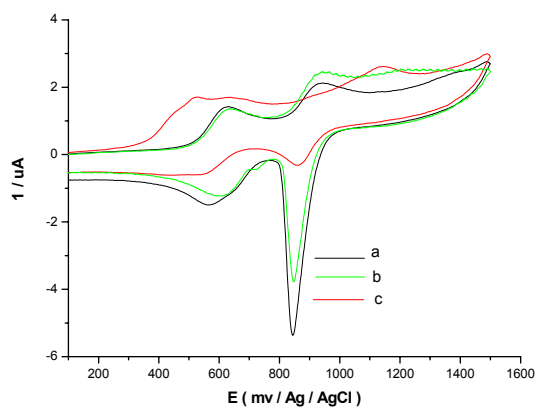

**a.** receptor **1**; **b.** receptor **1** upon addition of 1.5 equiv  $AcO^-$ ; **c.** receptor **1** upon addition of 1.5 equiv  $H_2PO_4^-$  in the presence of 1.5 equiv  $AcO^-$ .

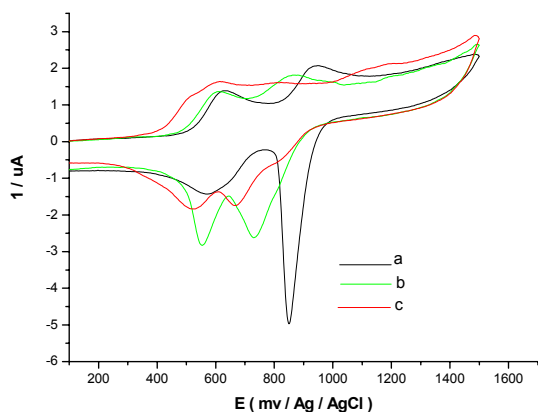

**a.** receptor **1**; **b.** receptor **1** upon addition of 1.5 equiv  $\text{HSO}_4^-$ ; **c.** receptor **1** upon addition of 1.5 equiv  $\text{H}_2\text{PO}_4^-$  in the presence of 1.5 equiv  $\text{HSO}_4^-$ .

Figure 2. Cyclic Voltammograms of receptor **1** upon addition of 1.5 equiv  $\text{H}_2\text{PO}_4^-$  recorded in  $\text{CH}_2\text{Cl}_2$  ( $1.67 \times 10^{-4} \text{M}$ ) in the presence of anions ( 1.5eq ) and  $\text{Bu}_4\text{NClO}_4$  (0.1M) as the supporting electrolyte.

### C. The effects of protonation on the CV behaviour of **1**

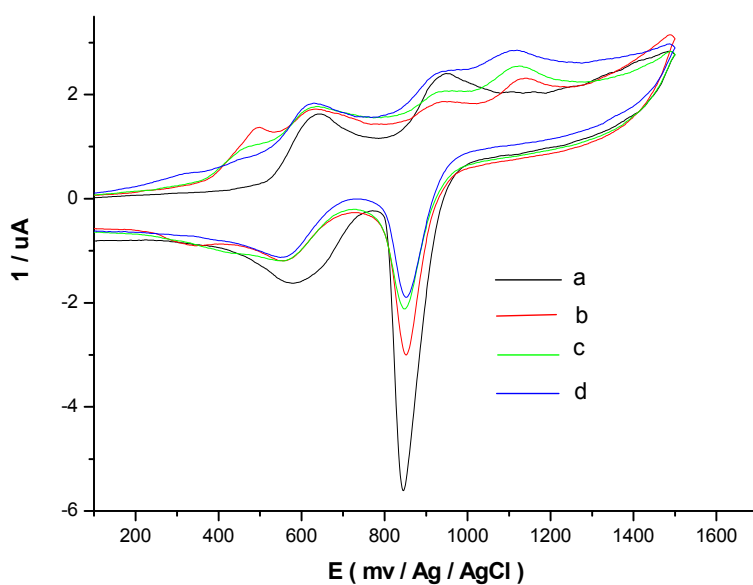

**a.** receptor **1**; **b.** receptor **1** upon addition of 2 equiv  $\text{H}_2\text{PO}_4^-$ ; **c.** receptor **1** upon addition of 1 equiv  $\text{Bu}_4\text{NOH}$  in the presence of 2 equiv  $\text{H}_2\text{PO}_4^-$ ; **d.** receptor **1** upon addition of 2 equiv  $\text{Bu}_4\text{NOH}$  in the presence of 2 equiv  $\text{H}_2\text{PO}_4^-$

Figure 3. Cyclic Voltammograms of receptor **1** upon addition of 2 equiv  $\text{H}_2\text{PO}_4^-$  recorded in  $\text{CH}_2\text{Cl}_2$  ( $1.67 \times 10^{-4} \text{M}$ ) in the presence of  $\text{Bu}_4\text{NOH}$  ( 1eq, 2eq ) and  $\text{Bu}_4\text{NClO}_4$  (0.1M) as the supporting electrolyte.

5.  $^1\text{H}$  NMR spectra study:

a. The stoichiometry of receptor **1** –  $\text{H}_2\text{PO}_4^-$  Complex ( Job Plots )

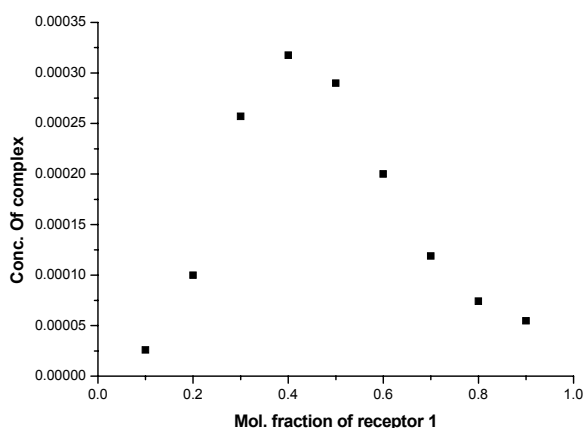

Figure 4. Job plot for the mixtures of **1** and  $\text{H}_2\text{PO}_4^-$  ( $[\text{1}] + [\text{G}] = 5 \times 10^{-3} \text{M}$ ) in  $\text{CDCl}_3$ . the solution of **1** ( $5 \times 10^{-3}$ ) and  $\text{H}_2\text{PO}_4^-$  ( $5 \times 10^{-3}$ ) in  $\text{DMSO-d}_6$  were prepared in separate volumetric flasks. The chemical shift of  $\text{C}=\text{C}-\text{H}$  of TTF unit was monitored as a function of mole fractions of receptor **1**.

b. Partial  $^1\text{H}$  NMR Spectra (300MHz) recorded in  $\text{DMSO-d}_6$ .

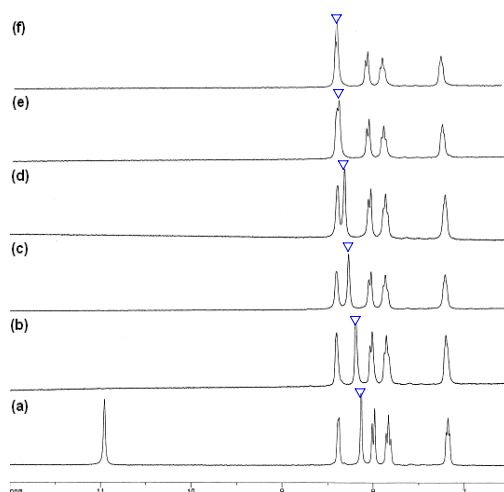

Figure 5.  $^1\text{H}$  NMR titrations curves of the perturbation of receptor **1** ( $8 \times 10^{-3} \text{mol L}^{-1}$ ) in  $\text{DMSO-d}_6$  upon addition of increasing amounts of  $\text{H}_2\text{PO}_4^-$  (0.5eq, 1eq, 1.5eq, 2eq).

#### 4. X-ray crystallography

The crystallographic detail about data collection and structure refinement are summarized in Table 1. The diffraction data were collected at 293K for the compound **1** on a Rigaku R-Axis RAPID IP area detector. Structures were solved by direct methods using SHELX-97 and refined by the full-matrix least-squares method on  $F^2$  using SHELXL-97 program. All non-hydrogen atoms were treated anisotropically. And the hydrogen atoms were introduced at calculated positions. The atomic coordinations, calculated hydrogen coordinates, full bond lengths and angle, and the displacement parameters are listed in the following tables.

Table 1. Crystal data and structure refinement for compound **1**.

|                                      |                                                                                                                     |
|--------------------------------------|---------------------------------------------------------------------------------------------------------------------|
| Identification code                  | 1                                                                                                                   |
| Empirical formula                    | $C_{14}H_{12}N_2O_6S_6$                                                                                             |
| Formula weight                       | 416.62                                                                                                              |
| Temperature                          | 293(2) K                                                                                                            |
| Wavelength                           | 0.71073 Å                                                                                                           |
| Crystal system, space group          | Monoclinic, P2(1)/c                                                                                                 |
| Unit cell dimensions                 | a = 10.683(2) Å    alpha = 90 deg.<br>b = 16.387(3) Å    beta = 90.98(3) deg.<br>c = 10.065(2) Å    gamma = 90 deg. |
| Volume                               | 1761.7(6) Å <sup>3</sup>                                                                                            |
| Z, Calculated density                | 4, 1.571 g/cm <sup>3</sup>                                                                                          |
| Absorption coefficient               | 0.779 mm <sup>-1</sup>                                                                                              |
| F(000)                               | 856                                                                                                                 |
| Crystal size                         | 0.68 x 0.49 x 0.40 mm                                                                                               |
| Theta range for data collection      | 1.91 to 27.40 deg.                                                                                                  |
| Limiting indices                     | -13 ≤ h ≤ 13, 0 ≤ k ≤ 21, -13 ≤ l ≤ 0                                                                               |
| Reflections collected / unique       | 3989 / 3989 [R(int) = 0.0000]                                                                                       |
| Completeness to theta = 27.40        | 99.4 %                                                                                                              |
| Absorption correction                | Empirical                                                                                                           |
| Max. and min. transmission           | 1.1753 and 0.7991                                                                                                   |
| Refinement method                    | Full-matrix least-squares on $F^2$                                                                                  |
| Data / restraints / parameters       | 3989 / 0 / 208                                                                                                      |
| Goodness-of-fit on $F^2$             | 1.010                                                                                                               |
| Final R indices [ $I > 2\sigma(I)$ ] | R1 = 0.0399, wR2 = 0.1051                                                                                           |
| R indices (all data)                 | R1 = 0.0537, wR2 = 0.1106                                                                                           |
| Largest diff. peak and hole          | 0.516 and -0.456 $d/e \cdot \text{Å}^{-3}$                                                                          |

Table 2. Bond lengths [Å] and angles [deg] for compound 1.

---

|            |          |             |          |
|------------|----------|-------------|----------|
| S(1)-C(9)  | 1.753(2) | N(1)-C(5)   | 1.325(3) |
| S(1)-C(7)  | 1.757(2) | N(1)-C(1)   | 1.344(3) |
| S(2)-C(8)  | 1.713(2) | N(2)-C(6)   | 1.354(3) |
| S(2)-C(9)  | 1.760(2) | N(2)-C(5)   | 1.406(2) |
| S(3)-C(11) | 1.743(2) | C(1)-C(2)   | 1.376(3) |
| S(3)-C(10) | 1.751(2) | C(2)-C(3)   | 1.363(3) |
| S(4)-C(10) | 1.751(2) | C(3)-C(4)   | 1.381(3) |
| S(4)-C(12) | 1.759(2) | C(4)-C(5)   | 1.389(3) |
| S(5)-C(12) | 1.743(2) | C(6)-C(7)   | 1.472(3) |
| S(5)-C(14) | 1.767(3) | C(7)-C(8)   | 1.340(3) |
| S(6)-C(11) | 1.742(2) | C(9)-C(10)  | 1.342(3) |
| S(6)-C(13) | 1.778(3) | C(11)-C(12) | 1.346(3) |
| O(1)-C(6)  | 1.227(2) |             |          |

---

|                  |            |                  |            |
|------------------|------------|------------------|------------|
| C(9)-S(1)-C(7)   | 94.43(9)   | N(2)-C(6)-C(7)   | 116.45(18) |
| C(8)-S(2)-C(9)   | 94.69(10)  | C(8)-C(7)-C(6)   | 128.39(19) |
| C(11)-S(3)-C(10) | 95.84(10)  | C(8)-C(7)-S(1)   | 116.53(16) |
| C(10)-S(4)-C(12) | 95.17(10)  | C(6)-C(7)-S(1)   | 115.02(14) |
| C(12)-S(5)-C(14) | 103.14(14) | C(7)-C(8)-S(2)   | 118.97(16) |
| C(11)-S(6)-C(13) | 103.43(12) | C(10)-C(9)-S(1)  | 124.31(16) |
| C(5)-N(1)-C(1)   | 116.7(2)   | C(10)-C(9)-S(2)  | 121.14(15) |
| C(6)-N(2)-C(5)   | 127.33(18) | S(1)-C(9)-S(2)   | 114.55(11) |
| N(1)-C(1)-C(2)   | 123.7(2)   | C(9)-C(10)-S(4)  | 124.57(16) |
| C(3)-C(2)-C(1)   | 118.1(2)   | C(9)-C(10)-S(3)  | 120.86(16) |
| C(2)-C(3)-C(4)   | 120.4(2)   | S(4)-C(10)-S(3)  | 114.56(11) |
| C(3)-C(4)-C(5)   | 117.0(2)   | C(12)-C(11)-S(6) | 123.35(17) |
| N(1)-C(5)-C(4)   | 124.15(19) | C(12)-C(11)-S(3) | 117.07(18) |
| N(1)-C(5)-N(2)   | 112.36(18) | S(6)-C(11)-S(3)  | 119.57(14) |
| C(4)-C(5)-N(2)   | 123.5(2)   | C(11)-C(12)-S(5) | 123.71(19) |
| O(1)-C(6)-N(2)   | 123.81(19) | C(11)-C(12)-S(4) | 117.29(17) |
| O(1)-C(6)-C(7)   | 119.74(19) | S(5)-C(12)-S(4)  | 118.98(14) |

---



Table 3. Hydrogen coordinates ( $\text{\AA} \times 10^4$ ) and isotropic displacement parameters ( $\text{\AA}^2 \times 10^3$ ) for compound **1**.

|        | x     | y    | z    | U(eq) |
|--------|-------|------|------|-------|
| H(2B)  | 10287 | 2615 | 4399 | 53    |
| H(1A)  | 13820 | 3829 | 4459 | 68    |
| H(2A)  | 15013 | 3250 | 2838 | 64    |
| H(3A)  | 14125 | 2272 | 1475 | 56    |
| H(4A)  | 12046 | 1890 | 1761 | 50    |
| H(8A)  | 8509  | 2522 | 5155 | 47    |
| H(13A) | 824   | 565  | 6607 | 120   |
| H(13B) | 1587  | 1225 | 5837 | 120   |
| H(13C) | 2291  | 553  | 6670 | 120   |
| H(14A) | 1012  | -530 | 258  | 152   |
| H(14B) | 2047  | 147  | 227  | 152   |
| H(14C) | 1004  | 179  | 1303 | 152   |

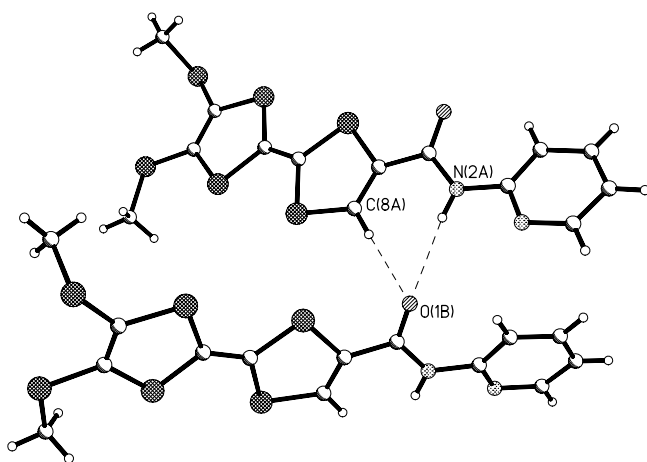

Figure 6. Intermolecular hydrogen bonds in the crystal of compound **1** ( $\text{N}(2)\text{-H}(2)\cdots\text{O}(1)^i$ ,  $\text{C}(8)\text{-H}(8)\cdots\text{O}(1)^i$ ,  $i: x, 0.5-y, 0.5+z$ ).

Table 4. Intermolecular hydrogen bonds in the crystal of compound **1**.

| D  | H   | A  | D-H( $\text{\AA}$ ) | H...A( $\text{\AA}$ ) | D...A( $\text{\AA}$ ) | D-H...A( $^\circ$ ) | Symop_for_A       |
|----|-----|----|---------------------|-----------------------|-----------------------|---------------------|-------------------|
| N2 | H2B | O1 | 0.86                | 2.48                  | 3.339(2)              | 173                 | $x, 1/2-y, 1/2+z$ |
| C8 | H8A | O1 | 0.93                | 2.30                  | 3.220(3)              | 173                 | $x, 1/2-y, 1/2+z$ |
